# Supplementary material for: Electrospun nanofiber fabric: an efficient, breathable and wearable moist-electric generator
Source: Royal Society of Chemistry journal article supplement (doi:10.1039/d0ta11974a), 2021-01-01
Supplement: d0ta11974a4.pdf [file d0ta11974a4.pdf]

## Supporting Information

### **Electrospun nanofiber fabric: an efficient breathable and wearable moist-electric generator**

Zhaoyang Sun<sup>a</sup>, Lanlan Feng<sup>a</sup>, Chengdong Xiong<sup>a</sup>, Xinyang He<sup>a</sup>, Liming Wang<sup>a,\*</sup>, Xiaohong Qin<sup>a,\*</sup>,  
Jianyong Yu<sup>b</sup>

<sup>a</sup> *Key Laboratory of Textile Science & Technology, Ministry of Education, College of Textiles, Donghua University, Shanghai 201620, China*

<sup>b</sup> *Innovation Center for Textile Science and Technology, Donghua University, Shanghai 201620, China*

\* Corresponding authors.

E-mail addresses: wangliming@dhu.edu.cn (L. Wang), xhqin@dhu.edu.cn (X. Qin)

## **Additional Information**

### ***Materials***

PEO (Mw ~ 400,000), ethyl cellulose powders (Mw ~ 30,000), PS (Mw ~ 350,000), PVDF (Mw ~ 400,000) and PSSA (Mw ~ 750,000, 18 wt% in H<sub>2</sub>O) were purchased from Sigma Aldrich. PAN (Mw ~ 850,000) was provided by Shanghai Chemical Fibers Institute. PAA (Mw ~ 400,000) was supplied by Aladdin. PEG (Mw ~ 6000), N, N-dimethylformamide (DMF, 99%), tetrahydrofuran (THF, 99%), and N, N-dimethylacetamide (DMAc, 99%) were provided by Sinopharm Chemical Reagent Co., Ltd.

### ***Preparation of PEO nanofiber fabric***

10 wt% PEO solution was prepared for electrospinning by using deionized water as solvent. The obtained solution was magnetically stirred for 8 h. The applied voltage connected to the needle was 15 kV, the collection distance was 15 cm, and the flow rate was 0.5 ml h<sup>-1</sup>.

### ***Preparation of silk fibroin nanofiber fabric***

Cocoons were boiled for 60 min in an aqueous solution of Na<sub>2</sub>CO<sub>3</sub> with concentration of 0.5 wt% and then rinsed thoroughly with distilled water to extract the sericin proteins. The degummed silk was then directly dissolved in CaCl<sub>2</sub>/formic acid at room temperature. The degummed silk above was dissolved in 9.3 M LiBr solution at 60 °C for 4 h, yielding a 20% solution. This solution was dialyzed against distilled water using Slide-A-Lyzer dialysis cassettes (Pierce, molecular weight cut-off 3500) for 72 h to remove LiBr. The final concentration of aqueous silk solution was ~ 8 wt%, determined by weighing the remaining solid after drying. To electrospin silk fibroin nanofiber, the applied voltage connected to the needle was 15 kV, collection distance was 15 cm, and the flow rate was 1 ml h<sup>-1</sup>.

### ***Preparation of ethyl cellulose nanofiber fabric***

20 wt% ethyl cellulose solution was prepared for electrospinning by using mixture of DMAc and THF with weight ratio of 9:1 as solvent. The obtained solution was magnetically stirred for 3 h. The applied voltage was 15 kV, collection distance was 15 cm, and the flow rate was 0.6 ml h<sup>-1</sup>.

### ***Preparation of PAN/PSSA nanofiber fabric***

PAN/PSSA with different weight ratios (2:1, 4:1, 8:1) were dissolved in DMF to prepare the spinning solution. The content of PAN/PSSA blend system in the solution was 12 wt%.

The obtained PAN/PSSA solution was taken into a 10 ml syringe and delivered with a flow rate of 0.6 ml h<sup>-1</sup>. The applied voltage and collection distance were maintained at 13 kV and 15 cm, respectively.

***Preparation of PAN/PAA nanofiber fabric***

12 wt% PAN/PAA (weight ratio of 4:1) solution was prepared by using DMF as solvent. The obtained PAN/PAA solution was taken into a 10 ml syringe and delivered with a flow rate of 0.6 ml h<sup>-1</sup>. The applied voltage and collection distance were maintained at 13 kV and 13 cm, respectively.

***Preparation of PAN/PEG nanofiber fabric***

12 wt% PAN/PEG (weight ratio of 4:1) solution was prepared for electrospinning by using DMF as solvent. The applied voltage was 15 kV, collection distance was 15 cm, and the flow rate was 0.5 ml h<sup>-1</sup> during electrospinning.

***Preparation of PS/PSSA nanofiber fabric***

20 wt% PS/PSSA (weight ratio of 4:1) solution was prepared for electrospinning by using DMF as solvent. The applied voltage was 13 kV, collection distance was 15 cm, and the flow rate was 0.6 ml h<sup>-1</sup> during electrospinning.

***Preparation of PVDF/PSSA nanofiber fabric***

10 wt% PVDF/PSSA (weight ratio of 4:1) solution was prepared for electrospinning by using DMF as solvent. The applied voltage was 15 kV, collection distance was 14 cm, and the flow rate was 0.5 ml h<sup>-1</sup> during electrospinning.

***Preparation of PEO, PVA, silk fibroin and ethyl cellulose films***

The preparation of PEO, PVA, silk fibroin and ethyl cellulose solutions was same with the corresponding spinning solutions. Then polymer solution was casted into a Teflon mold and dried overnight in an oven at 40 °C to obtain the polymer film.

## Supplementary Figure

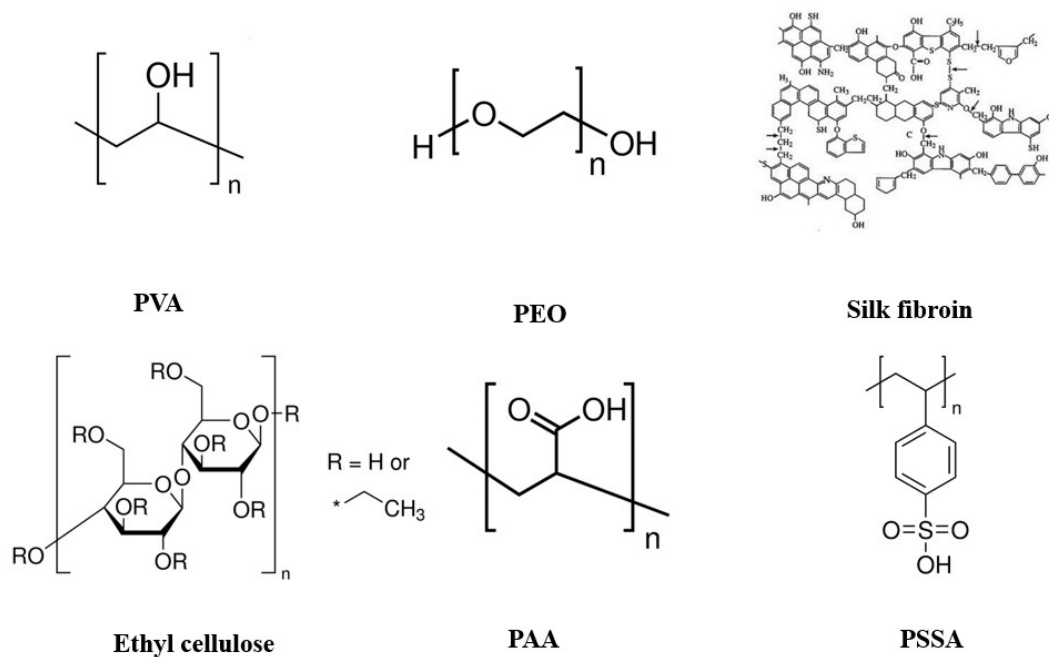

**Fig. S1.** Chemical structure of PVA, PEO, silk fibroin, ethyl cellulose, PAA, and PSSA.

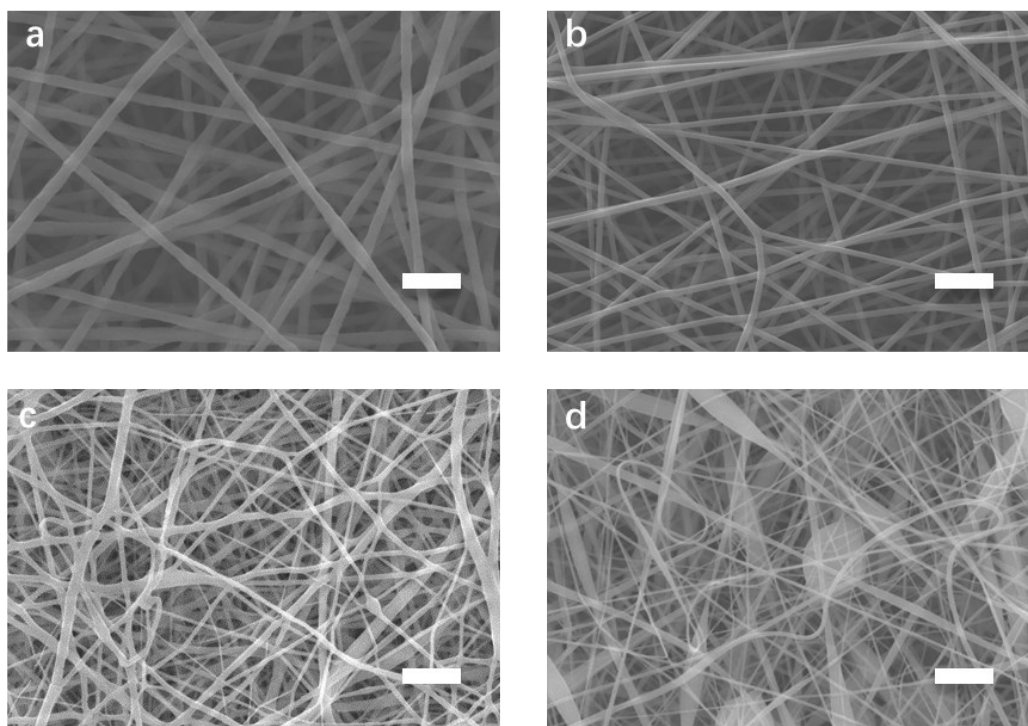

**Fig. S2.** SEM images of nanofiber fabrics: (a) PEO, (b) PVA, (c) silk fibroin, (d) ethyl cellulose. All the scale bars are 1 μm.

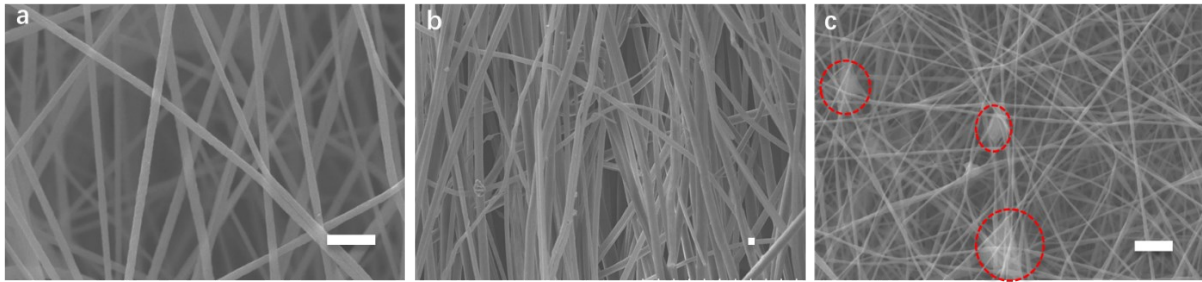

**Fig. S3.** SEM images of nanofiber fabrics. (a) PAN/PSSA nanofiber fabric. (b) PS/PSSA nanofiber fabric. (c) PVDF/PSSA nanofiber fabric. All the scale bars are 1  $\mu\text{m}$ .

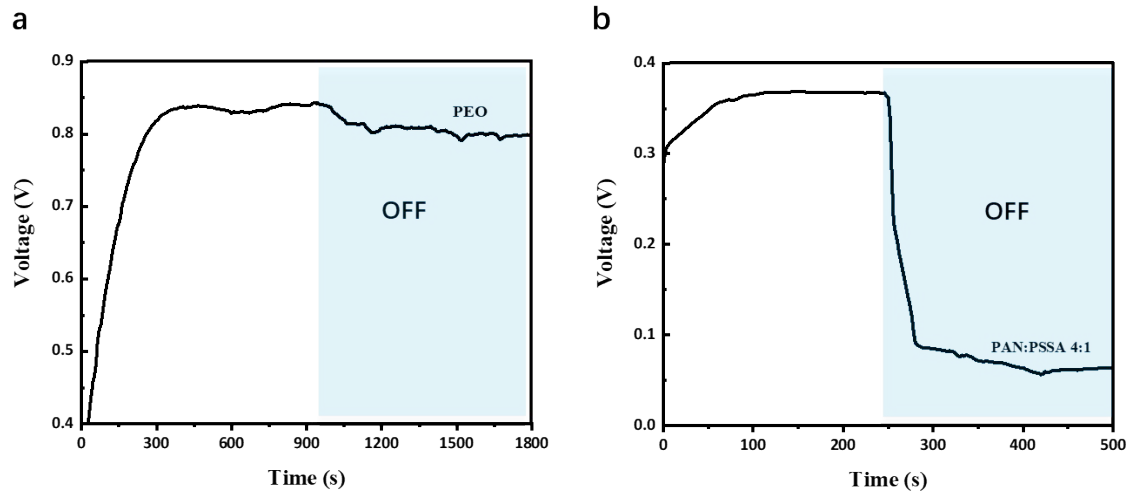

**Fig. S4.** (a) Voltage output of PEO nanofiber fabric after cutting off the moist air flow. (b) Voltage output of PAN/PSSA nanofiber fabric after cutting off the moist air flow.

**Table S1.** Specific surface area of casting membrane and electrospun nanofiber fabric

| Material form                | PVA                                     | PEO                                     |
|------------------------------|-----------------------------------------|-----------------------------------------|
| Casting membrane             | $2.158 \times 10^{-7} \text{ g m}^{-2}$ | $2.507 \times 10^{-7} \text{ g m}^{-2}$ |
| Electrospun nanofiber fabric | $11.529 \text{ g m}^{-2}$               | $10.335 \text{ g m}^{-2}$               |

**Table S2.** Current outputs, power density, air permeability and density of PEO, PVA and PAN/PSSA (4:1) nanofiber fabrics.

| Material | Current outputs<br>(nA cm <sup>-2</sup> ) | Power density<br>(nW cm <sup>-2</sup> ) | Air permeability<br>(mm s <sup>-1</sup> ) | Density<br>(g cm <sup>-3</sup> ) |
|----------|-------------------------------------------|-----------------------------------------|-------------------------------------------|----------------------------------|
| PEO      | 30                                        | 24.3                                    | 62.22                                     | $6.709 \times 10^{-5}$           |
| PVA      | 28                                        | 19.88                                   | 47.22                                     | $6.424 \times 10^{-5}$           |
| PAN/PSSA | 82                                        | 27.88                                   | 103.70                                    | $1.264 \times 10^{-4}$           |

**Table S3.** Summary of recent rising MEGs.

| Ref.            | Material         | Form                                | Mechanism                                       | Voltage       | Current density                           |
|-----------------|------------------|-------------------------------------|-------------------------------------------------|---------------|-------------------------------------------|
| 1               | GO               | Film                                | Gradient diffusion                              | 0.026 V       | $5 \mu\text{A cm}^{-1}$                   |
| 2               | GO               | Printed film                        | Gradient diffusion                              | 0.45 V        | $2 \mu\text{A cm}^{-1}$                   |
| 3               | GO               | 3D-aerogel                          | Gradient diffusion                              | 0.3 V         | $3.5 \text{ mA cm}^{-1}$                  |
| 4               | GO               | Foam                                | Gradient diffusion                              | 1.5 V         | $0.136 \text{ mA cm}^{-1}$                |
| 5               | GO               | Fiber shape                         | Gradient diffusion                              | 0.3 V         | $0.7 \mu\text{A cm}^{-1}$                 |
| 6               | GO               | Porous structure                    | Gradient diffusion                              | 0.45 V        | $90 \text{ nA cm}^{-1}$                   |
| 7               | Carbon           | Porous film                         | Gradient diffusion                              | 0.68 V        | $3 \text{ nA cm}^{-1}$                    |
| 8               | Carbon           | Carbon dots on paper                | Gradient diffusion                              | 0.04 V        | $0.142 \mu\text{A cm}^{-1}$               |
| 9               | PPy              | Nanowire                            | Gradient diffusion                              | 0.072 V       | $0.14 \mu\text{A cm}^{-1}$                |
| 10              | PSSA             | Membrane                            | Gradient diffusion                              | 0.8 V         | $0.15 \text{ mA cm}^{-1}$                 |
| 11              | PSS/PVA          | Membrane                            | Gradient diffusion                              | 0.6 V         | $2 \mu\text{A cm}^{-1}$                   |
| 12              | GO/PAAS          | Membrane                            | Gradient diffusion                              | 0.6 V         | $1.2 \mu\text{A cm}^{-1}$                 |
| 13              | HCl/PVA          | Electrolyte gel                     | Gradient diffusion                              | 0.348 V       | $655 \mu\text{A cm}^{-1}$                 |
| 14              | Cellulose        | Aerogel                             | Streaming current                               | 0.11 V        | $22 \text{ nA cm}^{-1}$                   |
| 15              | Cellulose        | Paper                               | Streaming current                               | 0.25 V        | $15 \text{ nA cm}^{-1}$                   |
| 16              | Protein          | Nanowires                           | Self-recharging                                 | 0.5 V         | $115 \text{ nA cm}^{-1}$                  |
| 17              | TiO <sub>2</sub> | Nanowire network                    | Streaming current                               | 0.5 V         | $50 \mu\text{A cm}^{-1}$                  |
| <b>Our work</b> | <b>PEO</b>       | <b>Electrospun nanofiber fabric</b> | <b>Gradient diffusion and streaming current</b> | <b>0.83 V</b> | <b><math>30 \text{ nA cm}^{-1}</math></b> |

## References

- [1] F. Zhao, H. Cheng, Z. Zhang, L. Jiang, L. Qu, Direct Power Generation from a Graphene Oxide Film under Moisture, *Adv. Mater.*, 27 (2015) 4351–4357.
- [2] Y. Liang, F. Zhao, Z. Cheng, Y. Deng, Y. Xiao, H. Cheng, P. Zhang, Y. Huang, H. Shao, L. Qu, Electric power generation via asymmetric moisturizing of graphene oxide for flexible, printable and portable electronics, *Energy Environ. Sci.*, 11 (2018) 1730–1735.
- [3] F. Zhao, Y. Liang, H. Cheng, L. Jiang, L. Qu, Highly efficient moisture-enabled electricity generation from graphene oxide frameworks, *Energy Environ. Sci.*, 9 (2016) 912–916.
- [4] Y. Huang, H. Cheng, C. Yang, P. Zhang, Q. Liao, H. Yao, G. Shi, L. Qu, Interface-mediated hydroelectric generator with an output voltage approaching 1.5 volts, *Nature Commun.*, 9 (2018) 4166.
- [5] C. Shao, J. Gao, T. Xu, B. Ji, Y. Xiao, C. Gao, Y. Zhao, L. Qu, Wearable fiberform hydroelectric generator, *Nano Energy*, 53 (2018) 698–705.
- [6] H. Cheng, Y. Huang, F. Zhao, C. Yang, P. Zhang, L. Jiang, G. Shi, L. Qu, Spontaneous power source in ambient air of a well-directionally reduced graphene oxide bulk *Energy Environ. Sci.*, 11(2018) 2839–2845.
- [7] K. Liu, P. Yang, S. Li, J. Li, T. Ding, G. Xue, Q. Chen, G. Feng, J. Zhou, Induced Potential in Porous Carbon Films through Water Vapor Absorption, *Angew. Chem. Int. Ed.*, 55 (2016) 8003–8807.
- [8] Q. Li, M. Zhou, Q. Yang, M. Yang, Q. Wu, Z. Zhang, J. Yu, Flexible carbon dots composite paper for electricity generation from water vapor absorption, *J. Mater. Chem. A.*, 6 (2018) 10639–10643.
- [9] N. Chen, Q. Liu, C. Liu, G. Zhang, J. Jing, C. Shao, Y. Han, L. Qu, MEG actualized by high-valent metal carrier transport, *Nano Energy*, 65 (2019) 104047.
- [10] T. Xu, X. Ding, Y. Huang, C. Shao, L. Song, X. Gao, Z. Zhang, L. Qu, An efficient polymer moist-electric generator, *Energy Environ. Sci.*, 12 (2019) 972–978.
- [11] H. Wang, H. Cheng, Y. Huang, C. Yang, D. Wang, C. Li, L. Qu, Transparent, self-healing, arbitrary tailorable moist-electric film generator, *Nano energy*, 67 (2020), 104238.
- [12] Y. Huang, H. Cheng, C. Yang, H. Yao, C. Li, L. Qu, All-region-applicable, continuous power supply of graphene oxide composite, *Energy Environ. Sci.*, 12 (2019) 1848–1856.
- [13] Z. Luo, C. Liu, S. Fan, A moisture induced self-charging device for energy harvesting and storage, *Nano Energy*, 60 (2019) 371–376.
- [14] M. Li, L. Zong, W. Yang, X. Li, J. You, X. Wu, Z. Li, C. Li, Biological Nanofibrous Generator for Electricity Harvest from Moist Air Flow, *Adv. Funct. Mater.*, 29 (2019) 1901798.

- [15] X. Gao, T. Xu, C. Shao, Y. Han, B. Lu, Z. Zhang, L. Qu, Electric power generation using paper materials, *J. Mater. Chem. A.*, 7 (2019) 20574–20578.
- [16] X. Liu, H. Gao, J. Ward, X. Liu, B. Yin, T. Fu, J. Che, D. Lovley, J. Yao, Power generation from ambient humidity using protein nanowires, *Nature*, 578 (2020), 550–554.
- [17] D. Shen, M. Xiao, G. Zou, L. Liu, W. Duley, Y. Zhou, Self-Powered Wearable Electronics Based on Moisture Enabled Electricity Generation, *Adv. Mater.*, 30 (2018) 1705925.
